# Supplementary material for: Evolution of A bHLH Interaction Motif
Source: Int J Mol Sci. 2021 Jan 5;22(1):447. doi: 10.3390/ijms22010447 (PMC7794824; doi:10.3390/ijms22010447)
Supplement: Supplementary file 1 [file ijms-22-00447-s001.zip]

Archive with 5 entries (5 files):
- Fig S1_dis-pred_idds.pdf
- Fig S2_Y2H_.pdf
- Fig S3_McMYC-droptest.pdf
- Table S1_PSSMSearch.docx
- Table S2_chemical-shifts.docx
